# Supplementary material for: Stereospecific Epoxidation of Limonene Catalyzed by Peroxygenase from Oat Seeds
Source: MDPI journal article supplement (doi:10.3390/antiox10091462), 2021-09-14
Supplement: s1 [file s1]

# **Stereospecific epoxidation of limonene catalyzed by peroxygenase from oat seeds**

Daniela Maria Biondi, Claudia Sanfilippo, Angela Patti\*

Istituto di Chimica Biomolecolare, CNR – Via Paolo Gaifami 18, I-95126 Catania, Italy

\* Correspondence: [angela.patti@cnr.it](mailto:angela.patti@cnr.it)

|                                                                                     |      |      |
|-------------------------------------------------------------------------------------|------|------|
| GC profile of the biocatalyzed epoxidation of ( <i>R</i> )-limonene                 | Page | SI-1 |
| GC profile of the biocatalyzed epoxidation of ( <i>S</i> )-limonene                 |      | SI-2 |
| GC profile of the biocatalyzed epoxidation of ( <i>S</i> )-limonene-1,2-epoxide     |      | SI-3 |
| NMR spectra of ( <i>S</i> )-limonene-diepoxide obtained by biocatalyzed epoxidation |      | SI-4 |

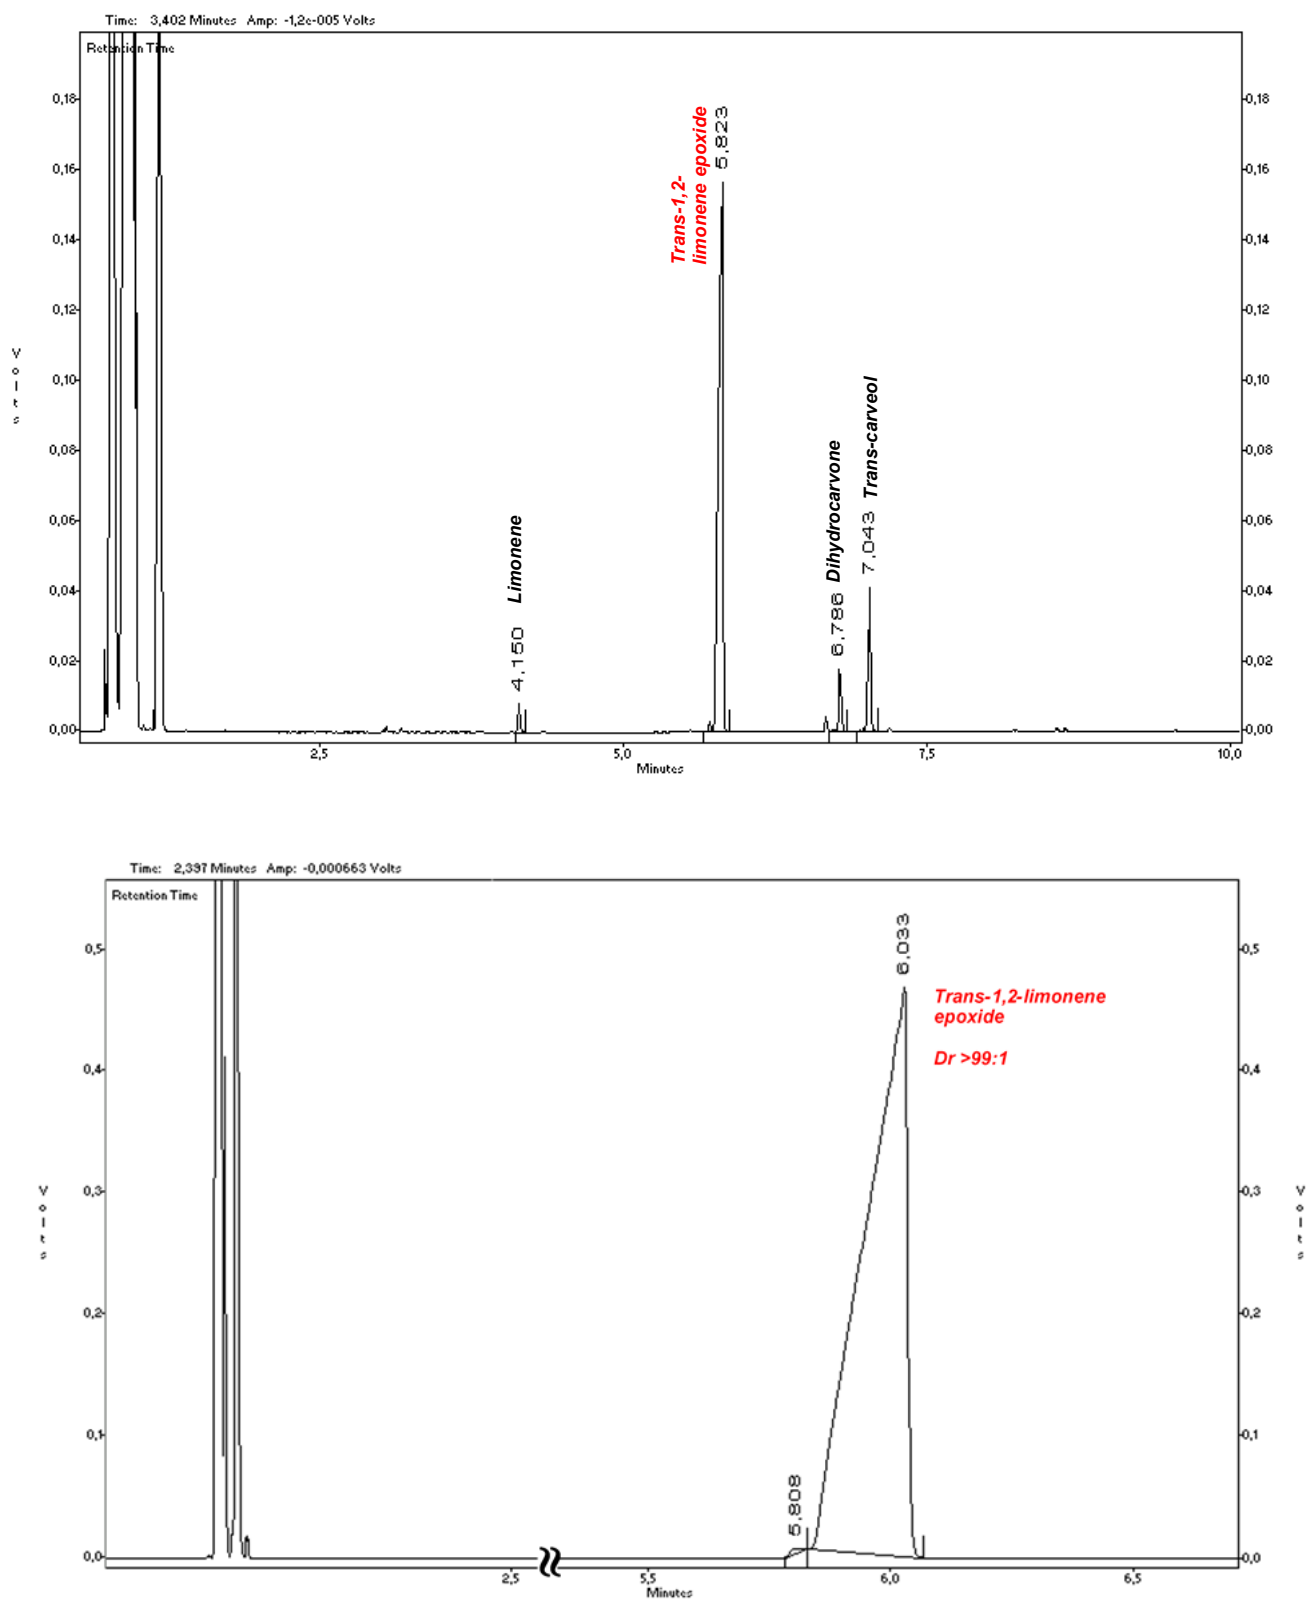

**Figure S1.** GC profile of the biocatalyzed epoxidation of (R)-limonene (top) and diastereoisomeric purity of the isolated (R)-limonene-1,2-epoxide (bottom)

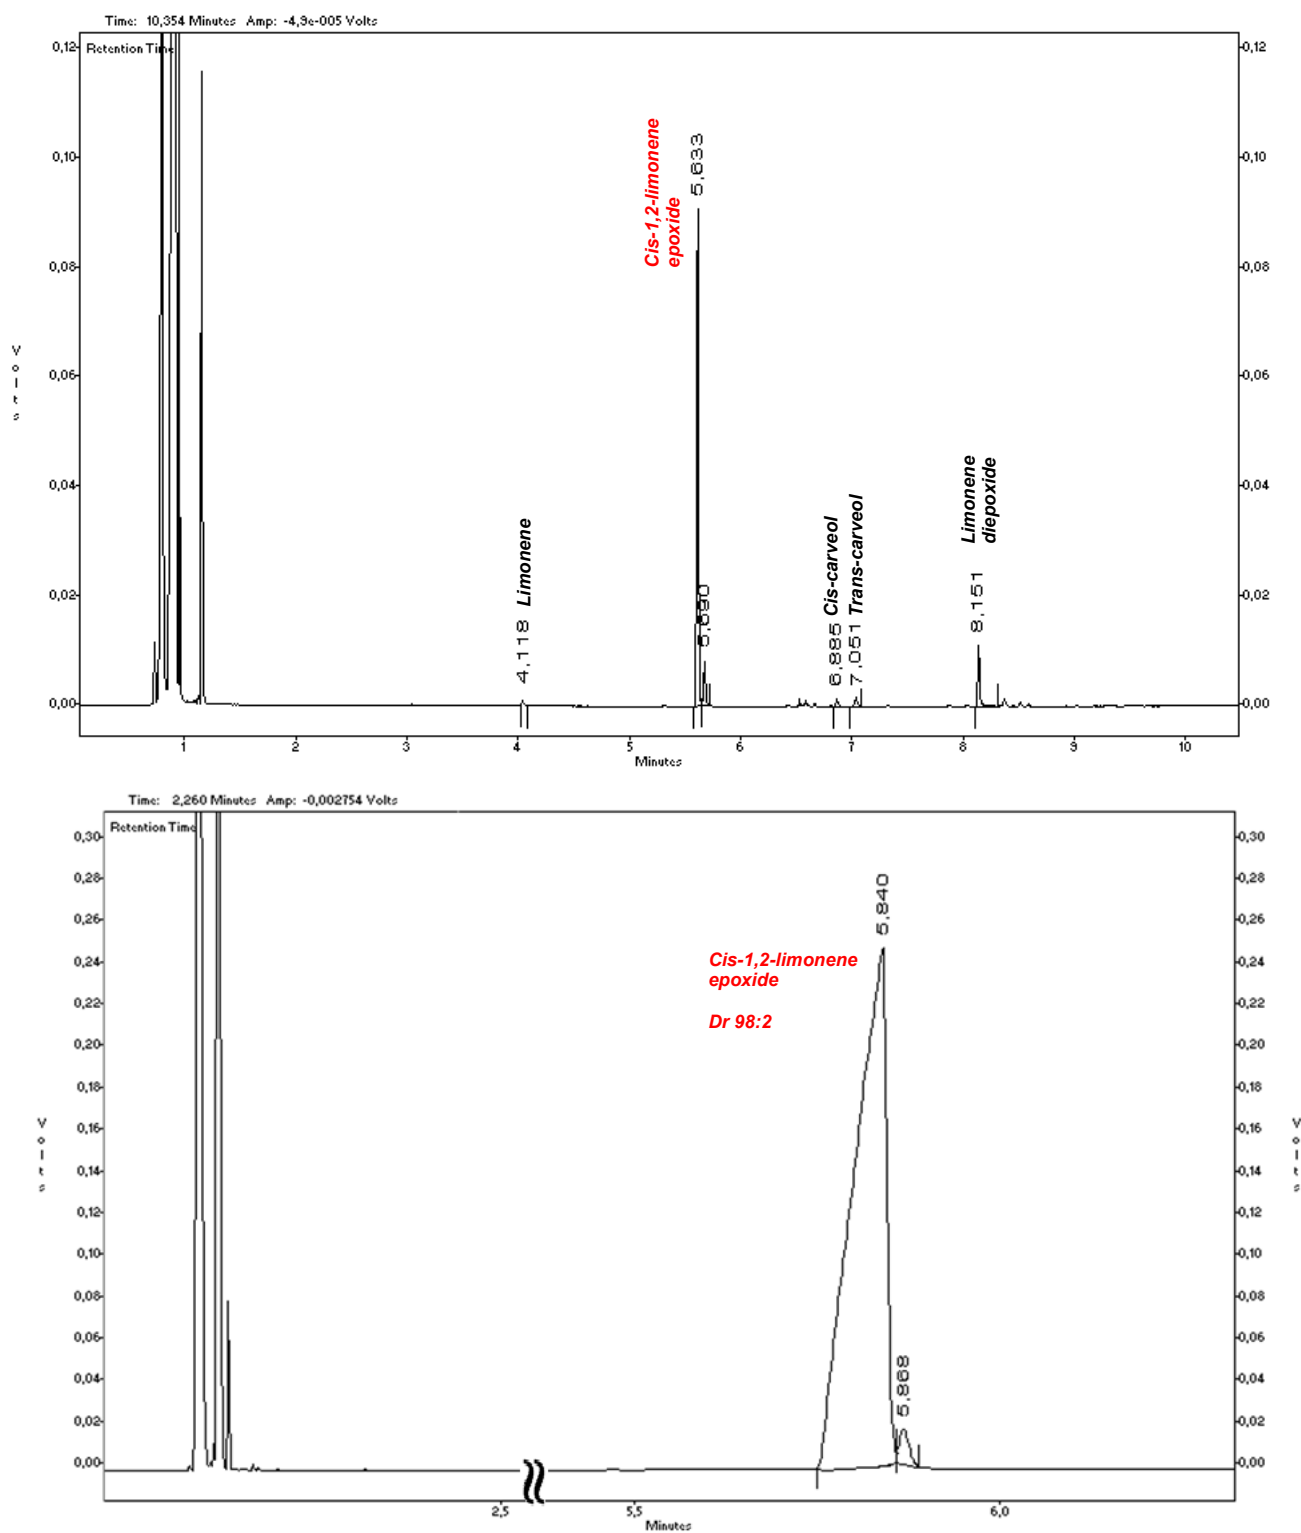

**Figure S2.** GC profile of the biocatalyzed epoxidation of (*S*)-limonene (top) and diastereoisomeric purity of the isolated (*S*)-limonene-1,2-epoxide (bottom)

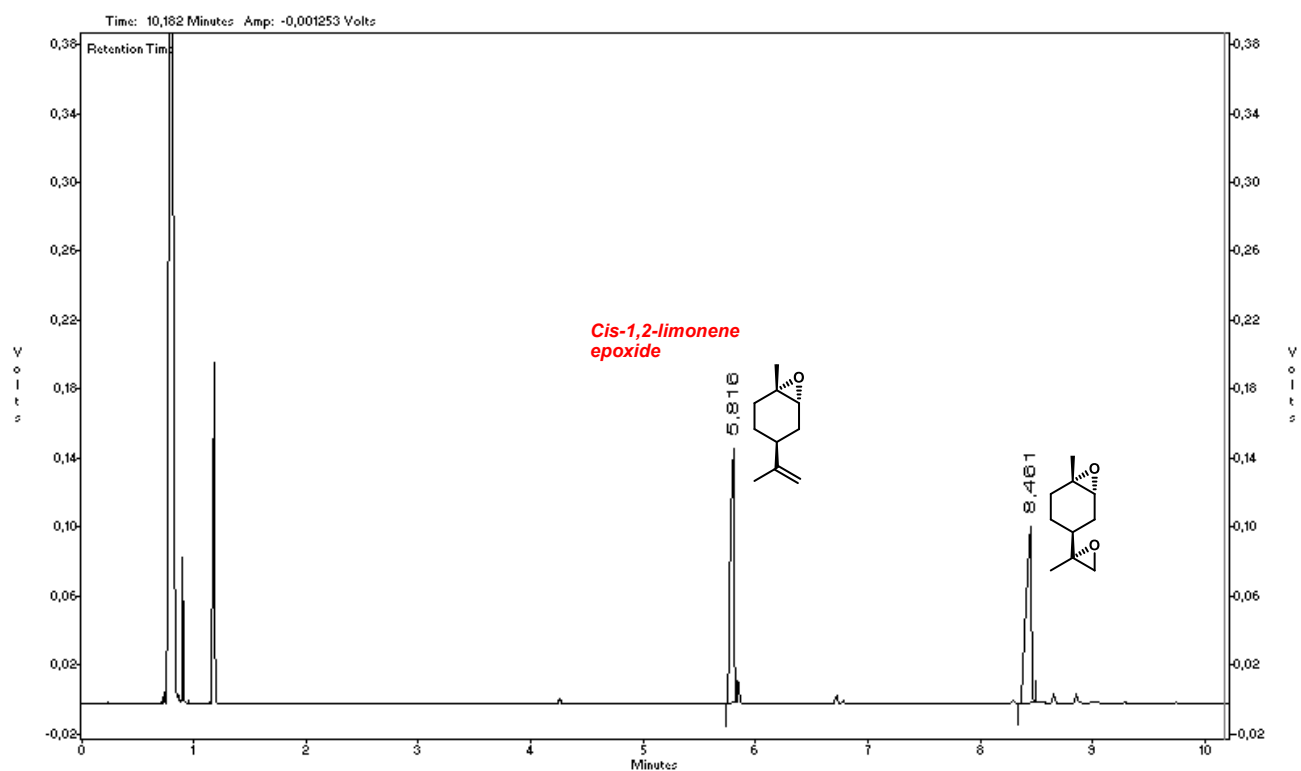

**Figure S3.** GC profile of the biocatalyzed epoxidation of *cis*-1,2-limonene epoxide from (*S*)-limonene to diepoxide at reaction time 2.5 h (about 50% conversion)

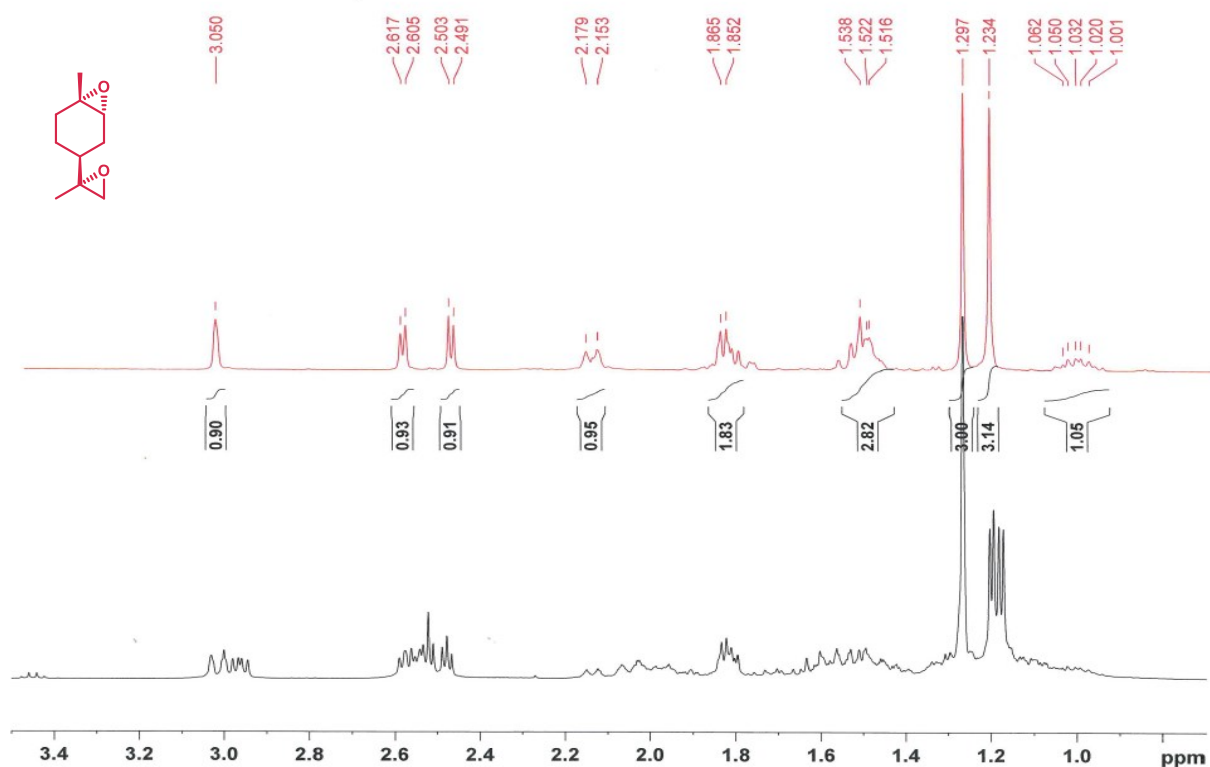

**Figure S4.** <sup>1</sup>H-NMR spectra of the mixture of diepoxides obtained by chemical epoxidation of (*S*)-limonene (black trace) and diepoxide obtained by biocatalyzed epoxidation of (*S*)-limonene (red trace)

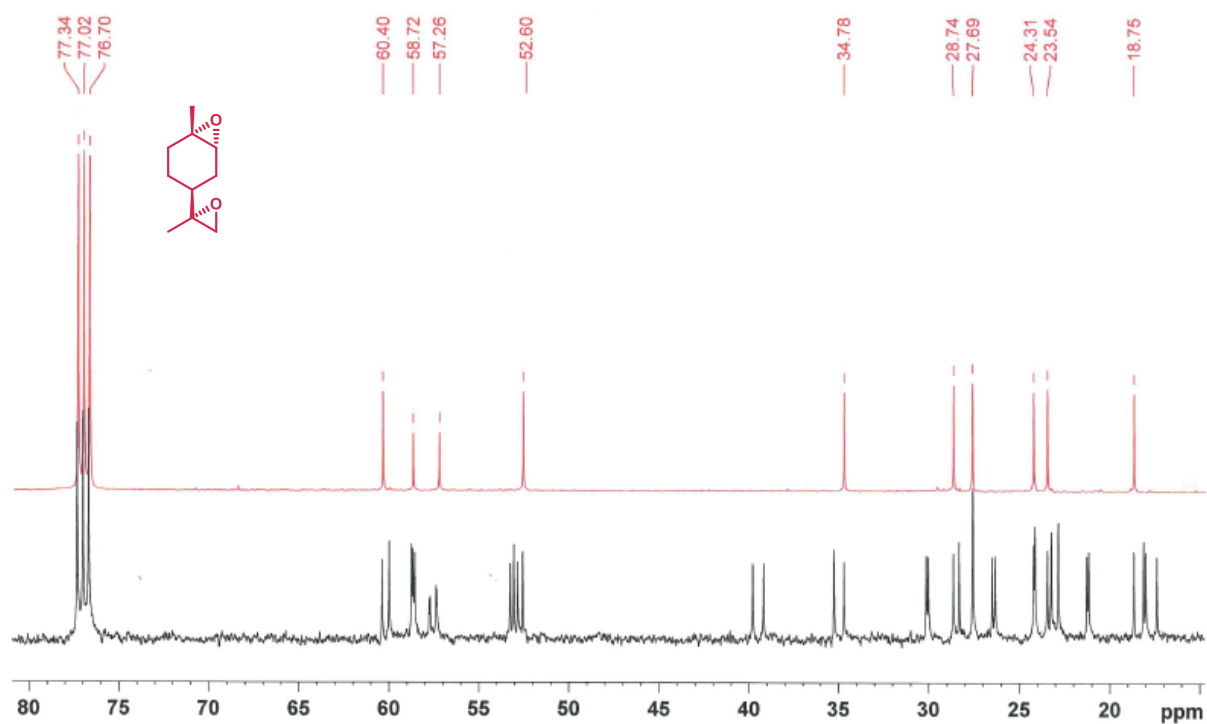

**Figure S5.** <sup>13</sup>C-NMR spectra of the mixture of diepoxides obtained by chemical epoxidation of (*S*)-limonene (black trace) and diepoxide obtained by biocatalyzed epoxidation of (*S*)-limonene (red trace)
